# Supplementary material for: Comorbidity Trajectories Associated With Alzheimer’s Disease: A Matched Case-Control Study in a United States Claims Database
Source: PubMed Central journal article supplement (PMC8531650; doi:10.3389/fnins.2021.749305), 2021-10-08
Supplement: Table_1.pdf [file Table_1.pdf]

## *Supplementary Material*

**Supplementary Table 1. Comorbidities with  $\geq 5\%$  prevalence among both cases and controls**

| 3-digit ICD grouping | Description                                                        | Overall<br>N=186,064 |            | Cases<br>N=93,032  |            | Controls<br>N=93,032 |            | OR from GEE model<br>(95% CI)* |
|----------------------|--------------------------------------------------------------------|----------------------|------------|--------------------|------------|----------------------|------------|--------------------------------|
|                      |                                                                    | Number of patients   | Prevalence | Number of patients | Prevalence | Number of patients   | Prevalence |                                |
| <b>CLUSTER 1</b>     |                                                                    |                      |            |                    |            |                      |            |                                |
| 401                  | Essential hypertension                                             | 138,662              | 74.5       | 77,804             | 83.6       | 60,858               | 65.4       | 2.08 (2.05, 2.10)              |
| 780                  | General symptoms                                                   | 124,434              | 66.9       | 80,259             | 86.3       | 44,175               | 47.5       | 3.14 (3.10, 3.18)              |
| 786                  | Symptoms involving respiratory system and other chest symptoms     | 122,161              | 65.6       | 70,509             | 75.8       | 51,652               | 55.5       | 1.85 (1.82, 1.87)              |
| 719                  | Other and unspecified disorders of joint                           | 99,270               | 53.3       | 59,076             | 63.5       | 40,194               | 43.2       | 1.85 (1.83, 1.88)              |
| 427                  | Cardiac dysrhythmias                                               | 71,654               | 38.5       | 41,652             | 44.8       | 30,002               | 32.2       | 1.61 (1.59, 1.64)              |
| 599                  | Other disorders of urethra and urinary tract                       | 67,782               | 36.4       | 42,256             | 45.4       | 25,526               | 27.4       | 1.90 (1.87, 1.93)              |
| 959                  | Injury, other and unspecified                                      | 50,113               | 26.9       | 34,178             | 36.7       | 15,935               | 17.1       | 2.33 (2.39, 2.49)              |
| 276                  | Disorders of fluid, electrolyte, and acid-base balance             | 47,827               | 25.7       | 30,866             | 33.2       | 16,961               | 18.2       | 1.85 (1.82, 1.89)              |
| 781                  | Symptoms involving nervous and musculoskeletal systems             | 47,290               | 25.4       | 33,227             | 35.7       | 14,063               | 15.1       | 2.60 (2.54, 2.65)              |
| 110                  | Dermatophytosis                                                    | 46,455               | 25.0       | 29,717             | 31.9       | 16,738               | 18.0       | 1.90 (1.86, 1.94)              |
| 428                  | Heart failure                                                      | 41,215               | 22.2       | 23,627             | 25.4       | 17,588               | 18.9       | 1.42 (1.39, 1.45)              |
| 728                  | Disorders of muscle, ligament, and fascia                          | 38,419               | 20.6       | 25,340             | 27.2       | 13,079               | 14.1       | 1.96 (1.91, 2.00)              |
| 799                  | Other ill-defined and unknown causes of morbidity and mortality    | 34,675               | 18.6       | 22,104             | 23.8       | 12,571               | 13.5       | 1.73 (1.69, 1.78)              |
| 294                  | Persistent mental disorders due to conditions classified elsewhere | 31,899               | 17.1       | 29,356             | 31.6       | 2,543                | 2.7        | 8.55 (8.15, 8.96)              |
| 331                  | Other cerebral degenerations                                       | 29,056               | 15.6       | 24,132             | 25.9       | 4,924                | 5.3        | 4.96 (4.80, 5.13)              |
| 348                  | Other conditions of brain                                          | 20,061               | 10.8       | 15,996             | 17.2       | 4,065                | 4.4        | 3.71 (3.58, 3.86)              |
| 298                  | Other nonorganic psychoses                                         | 19,620               | 10.5       | 16,789             | 18.0       | 2,831                | 3.0        | 4.98 (4.77, 5.20)              |

## Comorbidity trajectories associated with Alzheimer's disease

| 3-digit ICD grouping | Description                                                                    | Overall<br>N=186,064 |            | Cases<br>N=93,032  |            | Controls<br>N=93,032 |            | OR from GEE model<br>(95% CI)* |
|----------------------|--------------------------------------------------------------------------------|----------------------|------------|--------------------|------------|----------------------|------------|--------------------------------|
|                      |                                                                                | Number of patients   | Prevalence | Number of patients | Prevalence | Number of patients   | Prevalence |                                |
| 293                  | Transient mental disorders due to conditions classified elsewhere              | 12,712               | 6.8        | 10,664             | 11.5       | 2,048                | 2.2        | 4.16 (3.95, 4.39)              |
| <b>CLUSTER 2</b>     |                                                                                |                      |            |                    |            |                      |            |                                |
| 486                  | Pneumonia, organism unspecified                                                | 32,497               | 17.5       | 19,137             | 20.6       | 13,360               | 14.4       | 1.42 (1.38, 1.45)              |
| 593                  | Other disorders of kidney and ureter                                           | 28,535               | 15.3       | 16,865             | 18.1       | 11,670               | 12.5       | 1.49 (1.45, 1.53)              |
| 585                  | Chronic kidney disease (CKD)                                                   | 24,790               | 13.3       | 14,570             | 15.7       | 10,220               | 11.0       | 1.42 (1.38, 1.46)              |
| 511                  | Pleurisy                                                                       | 21,283               | 11.4       | 11,634             | 12.5       | 9,649                | 10.4       | 1.11 (1.08, 1.14)              |
| 584                  | Acute kidney failure                                                           | 19,739               | 10.6       | 12,168             | 13.1       | 7,571                | 8.1        | 1.45 (1.41, 1.50)              |
| 995                  | Certain adverse effects not elsewhere classified                               | 16,905               | 9.1        | 10,446             | 11.2       | 6,459                | 6.9        | 1.57 (1.52, 1.62)              |
| 491                  | Chronic bronchitis                                                             | 16,678               | 9.0        | 9,342              | 10.0       | 7,336                | 7.9        | 1.35 (1.31, 1.40)              |
| 796                  | Other non-specific abnormal findings                                           | 15,535               | 8.4        | 9,601              | 10.3       | 5,934                | 6.4        | 1.54 (1.49, 1.59)              |
| 403                  | Hypertensive chronic kidney disease                                            | 13,385               | 7.2        | 8,188              | 8.8        | 5,197                | 5.6        | 1.49 (1.43, 1.55)              |
| 410                  | Acute myocardial infarction                                                    | 11,661               | 6.3        | 6,764              | 7.3        | 4,897                | 5.3        | 1.36 (1.31, 1.41)              |
| 288                  | Diseases of white blood cells                                                  | 11,246               | 6.0        | 7,007              | 7.5        | 4,239                | 4.6        | 1.50 (1.44, 1.56)              |
| 38                   | Septicemia                                                                     | 11,128               | 6.0        | 6,935              | 7.5        | 4,193                | 4.5        | 1.49 (1.43, 1.55)              |
| 514                  | Pulmonary congestion and hypostasis                                            | 11,117               | 6.0        | 6,596              | 7.1        | 4,521                | 4.9        | 1.35 (1.29, 1.40)              |
| 453                  | Other venous embolism and thrombosis                                           | 11,002               | 5.9        | 6,650              | 7.2        | 4,352                | 4.7        | 1.55 (1.48, 1.61)              |
| V49                  | Other conditions influencing health status                                     | 10,535               | 5.7        | 6,469              | 7.0        | 4,066                | 4.4        | 1.51 (1.45, 1.58)              |
| 560                  | Intestinal obstruction without mention of hernia                               | 9,899                | 5.3        | 6,101              | 6.6        | 3,798                | 4.1        | 1.62 (1.56, 1.70)              |
| 492                  | Emphysema                                                                      | 9,706                | 5.2        | 5,557              | 6.0        | 4,149                | 4.5        | 1.30 (1.25, 1.36)              |
| 41                   | Bacterial infection in conditions classified elsewhere and of unspecified site | 9,619                | 5.2        | 6,379              | 6.9        | 3,240                | 3.5        | 1.81 (1.73, 1.90)              |
| 805                  | Fracture of vertebral column without mention of spinal cord injury             | 9,344                | 5.0        | 6,157              | 6.6        | 3,187                | 3.4        | 1.91 (1.82, 2.00)              |
| <b>CLUSTER 3</b>     |                                                                                |                      |            |                    |            |                      |            |                                |
| 784                  | Symptoms involving head and neck                                               | 53,436               | 28.7       | 35,459             | 38.11      | 17,977               | 19.33      | 2.25 (2.20, 2.29)              |
| V57                  | Care involving use of rehabilitation procedures                                | 31,398               | 16.9       | 20,260             | 21.8       | 11,138               | 11.0       | 1.89 (1.84, 1.93)              |
| 437                  | Other and ill-defined cerebrovascular disease                                  | 25,825               | 13.9       | 19,588             | 21.1       | 6,237                | 6.7        | 3.12 (3.02, 3.21)              |

| 3-digit ICD grouping | Description                                                   | Overall<br>N=186,064 |            | Cases<br>N=93,032  |            | Controls<br>N=93,032 |            | OR from GEE model<br>(95% CI)* |
|----------------------|---------------------------------------------------------------|----------------------|------------|--------------------|------------|----------------------|------------|--------------------------------|
|                      |                                                               | Number of patients   | Prevalence | Number of patients | Prevalence | Number of patients   | Prevalence |                                |
| 300                  | Anxiety, dissociative and somatoform disorders                | 25,601               | 13.8       | 18,388             | 19.8       | 7,213                | 7.8        | 2.60 (2.53, 2.68)              |
| 783                  | Symptoms concerning nutrition, metabolism, and development    | 25,469               | 13.7       | 17,988             | 19.3       | 7,481                | 8.0        | 2.46 (2.40, 2.54)              |
| 311                  | Depressive disorder, not elsewhere classified                 | 24,954               | 13.4       | 18,995             | 20.4       | 5,959                | 6.4        | 3.18 (3.08, 3.28)              |
| 435                  | Transient cerebral ischemia                                   | 23,894               | 12.8       | 16,719             | 18.0       | 7,175                | 7.7        | 2.46 (2.39, 2.53)              |
| V15                  | Other personal history presenting hazards to health           | 23,819               | 12.8       | 16,218             | 17.4       | 7,601                | 8.2        | 2.03 (1.97, 2.09)              |
| 434                  | Occlusion of cerebral arteries                                | 22,024               | 11.8       | 15,560             | 16.7       | 6,464                | 7.0        | 2.50 (2.42, 2.58)              |
| 924                  | Contusion of lower limb and of other and unspecified sites    | 20,998               | 11.3       | 14,146             | 15.2       | 6,852                | 7.4        | 2.12 (2.06, 2.19)              |
| 707                  | Chronic ulcer of skin                                         | 20,073               | 10.8       | 12,617             | 13.6       | 7,456                | 8.0        | 1.73 (1.67, 1.78)              |
| 458                  | Hypotension                                                   | 19,292               | 10.3       | 12,763             | 13.7       | 6,529                | 7.0        | 1.94 (1.88, 2.01)              |
| 436                  | Acute, but ill-defined, cerebrovascular disease               | 18,748               | 10.1       | 13,097             | 14.1       | 5,651                | 6.1        | 2.48 (2.39, 2.56)              |
| 296                  | Episodic mood disorders                                       | 14,363               | 7.7        | 11,130             | 12.0       | 3,233                | 3.5        | 3.61 (3.46, 3.76)              |
| 438                  | Late effects of cerebrovascular disease                       | 13,705               | 7.4        | 9,890              | 10.6       | 3,815                | 4.1        | 2.53 (2.43, 2.64)              |
| 873                  | Other open wound of head                                      | 13,686               | 7.34       | 9,568              | 10.3       | 4,118                | 4.4        | 2.33 (2.25, 2.42)              |
| V71                  | Observation and evaluation for suspected conditions not found | 13,394               | 7.2        | 8,929              | 9.6        | 4,465                | 4.8        | 1.91 (1.84, 1.98)              |
| 920                  | Contusion of face, scalp, and neck except eye(s)              | 13,316               | 7.2        | 9,678              | 10.4       | 3,638                | 3.9        | 2.61 (2.51, 2.71)              |
| 266                  | Deficiency of B-complex components                            | 10,870               | 5.8        | 7,724              | 8.3        | 3,146                | 3.4        | 2.29 (2.19, 2.39)              |
| 820                  | Fracture of neck of femur                                     | 10,777               | 5.8        | 7,349              | 7.9        | 3,428                | 3.7        | 2.07 (1.98, 2.16)              |
| 922                  | Contusion of trunk                                            | 10,421               | 5.6        | 7,277              | 7.8        | 3,144                | 3.4        | 2.38 (2.28, 2.48)              |
| 923                  | Contusion of upper limb                                       | 10,164               | 5.5        | 6,967              | 7.4        | 3,197                | 3.4        | 2.18 (2.09, 2.27)              |
| <b>CLUSTER 4</b>     |                                                               |                      |            |                    |            |                      |            |                                |
| 702                  | Other dermatoses                                              | 59,353               | 31.9       | 31,337             | 33.7       | 28,016               | 30.1       | 1.14 (1.12, 1.16)              |
| V72                  | Special investigations and examinations                       | 58,328               | 31.3       | 32,509             | 34.9       | 25,819               | 27.8       | 1.30 (1.28, 1.32)              |
| V43                  | Organ or tissue replaced by other means                       | 46,529               | 25.0       | 26,430             | 28.4       | 20,099               | 21.6       | 1.36 (1.33, 1.39)              |
| 365                  | Glaucoma                                                      | 37,941               | 20.4       | 21,110             | 22.7       | 16,831               | 18.1       | 1.38 (1.35, 1.41)              |

## Comorbidity trajectories associated with Alzheimer's disease

| 3-digit ICD grouping | Description                                                                 | Overall<br>N=186,064 |            | Cases<br>N=93,032  |            | Controls<br>N=93,032 |            | OR from GEE model<br>(95% CI)* |
|----------------------|-----------------------------------------------------------------------------|----------------------|------------|--------------------|------------|----------------------|------------|--------------------------------|
|                      |                                                                             | Number of patients   | Prevalence | Number of patients | Prevalence | Number of patients   | Prevalence |                                |
| 726                  | Peripheral enthesopathies and allied syndromes                              | 37,928               | 20.4       | 21,434             | 23.0       | 16,494               | 17.7       | 1.36 (1.33, 1.39)              |
| 466                  | Acute bronchitis and bronchiolitis                                          | 36,542               | 19.6       | 20,648             | 22.2       | 15,894               | 17.1       | 1.36 (1.33, 1.39)              |
| 238                  | Neoplasm of uncertain behavior of other and unspecified sites and tissues   | 35,273               | 19.0       | 19,024             | 20.4       | 16,249               | 17.5       | 1.18 (1.15, 1.21)              |
| 692                  | Contact dermatitis and other eczema                                         | 33,947               | 18.2       | 19,668             | 21.1       | 14,279               | 15.4       | 1.42 (1.39, 1.45)              |
| 173                  | Other and unspecified malignant neoplasm of skin                            | 31,753               | 17.1       | 17,211             | 18.5       | 14,542               | 15.6       | 1.24 (1.21, 1.27)              |
| V10                  | Personal history of malignant neoplasm                                      | 31,692               | 17.0       | 17,229             | 18.5       | 14,463               | 15.5       | 1.22 (1.19, 1.25)              |
| 211                  | Benign neoplasm of other parts of digestive system                          | 31,187               | 16.8       | 17,242             | 18.5       | 13,945               | 15.0       | 1.27 (1.24, 1.30)              |
| V70                  | General medical examination                                                 | 30,935               | 16.6       | 17,491             | 18.8       | 13,444               | 14.5       | 1.27 (1.24, 1.30)              |
| 465                  | Acute upper respiratory infections of multiple or unspecified sites         | 27,935               | 15.0       | 16,238             | 17.5       | 11,697               | 12.6       | 1.43 (1.39, 1.46)              |
| 379                  | Other disorders of eye                                                      | 26,993               | 14.5       | 15,381             | 16.5       | 11,612               | 12.5       | 1.33 (1.29, 1.36)              |
| 216                  | Benign neoplasm of skin                                                     | 24,930               | 13.4       | 13,323             | 14.3       | 11,607               | 12.5       | 1.12 (1.09, 1.15)              |
| 709                  | Other disorders of skin and subcutaneous tissue                             | 24,367               | 13.1       | 13,550             | 14.6       | 10,817               | 11.6       | 1.26 (1.23, 1.30)              |
| 569                  | Other disorders of intestine                                                | 23,086               | 12.4       | 13,526             | 14.5       | 9,560                | 10.3       | 1.47 (1.43, 1.51)              |
| 461                  | Acute sinusitis                                                             | 22,396               | 12.0       | 12,316             | 13.2       | 10,080               | 10.8       | 1.24 (1.21, 1.27)              |
| 477                  | Allergic rhinitis                                                           | 22,378               | 12.0       | 13,007             | 14.0       | 9,371                | 10.1       | 1.39 (1.35, 1.43)              |
| 727                  | Other disorders of synovium, tendon, and bursa                              | 20,856               | 11.2       | 11,474             | 12.3       | 9,382                | 10.1       | 1.23 (1.19, 1.26)              |
| V67                  | Follow-up examination                                                       | 20,597               | 11.1       | 11,598             | 12.5       | 8,999                | 9.7        | 1.28 (1.24, 1.32)              |
| 375                  | Disorders of lacrimal system                                                | 20,352               | 10.9       | 11,610             | 12.5       | 8,742                | 9.4        | 1.72 (1.67, 1.79)              |
| 706                  | Diseases of sebaceous glands                                                | 20,183               | 10.9       | 11,643             | 12.5       | 8,540                | 9.2        | 1.40 (1.36, 1.44)              |
| 553                  | Other hernia of abdominal cavity without mention of obstruction or gangrene | 19,813               | 10.7       | 11,598             | 12.5       | 8,215                | 8.8        | 1.46 (1.42, 1.50)              |
| 372                  | Disorders of conjunctiva                                                    | 19,805               | 10.6       | 11,704             | 12.6       | 8,101                | 8.7        | 1.45 (1.41, 1.49)              |
| 426                  | Conduction disorders                                                        | 19,472               | 10.5       | 11,768             | 12.7       | 7,704                | 8.3        | 1.54 (1.49, 1.59)              |
| 280                  | Iron deficiency anemias                                                     | 19,113               | 10.3       | 11,425             | 12.3       | 7,688                | 8.3        | 1.52 (1.47, 1.57)              |
| 402                  | Hypertensive heart disease                                                  | 18,707               | 10.1       | 11,228             | 12.1       | 7,479                | 8.0        | 1.55 (1.50, 1.60)              |
| 493                  | Asthma                                                                      | 18,134               | 9.7        | 10,028             | 10.8       | 8,106                | 8.7        | 1.31 (1.27, 1.35)              |

| 3-digit ICD grouping | Description                                                                  | Overall<br>N=186,064 |            | Cases<br>N=93,032  |            | Controls<br>N=93,032 |            | OR from GEE model<br>(95% CI)* |
|----------------------|------------------------------------------------------------------------------|----------------------|------------|--------------------|------------|----------------------|------------|--------------------------------|
|                      |                                                                              | Number of patients   | Prevalence | Number of patients | Prevalence | Number of patients   | Prevalence |                                |
| 459                  | Other disorders of circulatory system                                        | 16,873               | 9.1        | 10,362             | 11.1       | 6,511                | 7.0        | 1.59 (1.53, 1.64)              |
| 455                  | Hemorrhoids                                                                  | 16,547               | 8.9        | 9,780              | 10.5       | 6,767                | 7.3        | 1.47 (1.43, 1.52)              |
| 611                  | Other disorders of breast                                                    | 16,394               | 8.8        | 9,203              | 9.9        | 7,191                | 7.7        | 1.31 (1.27, 1.35)              |
| 413                  | Angina pectoris                                                              | 16,301               | 8.8        | 9,575              | 10.3       | 6,726                | 7.2        | 1.54 (1.48, 1.59)              |
| 739                  | Nonallopathic lesions, not elsewhere classified                              | 15,525               | 8.3        | 8,066              | 8.7        | 7,459                | 8.0        | 1.06 (1.02, 1.09)              |
| 490                  | Bronchitis, not specified as acute or chronic                                | 15,279               | 8.2        | 8,890              | 9.6        | 6,389                | 6.9        | 1.06 (1.02, 1.09)              |
| 373                  | Inflammation of eyelids                                                      | 14,909               | 8.0        | 8,572              | 9.2        | 6,337                | 6.8        | 1.38 (1.34, 1.43)              |
| 558                  | Other and unspecified noninfectious gastroenteritis and colitis              | 14,429               | 7.8        | 8,919              | 9.6        | 5,510                | 5.9        | 1.66 (1.61, 1.72)              |
| V03                  | Need for prophylactic vaccination and inoculation against bacterial diseases | 14,400               | 7.7        | 8,695              | 9.3        | 5,705                | 6.1        | 1.51 (1.46, 1.56)              |
| 681                  | Cellulitis and abscess of finger and toe                                     | 14,065               | 7.6        | 8,708              | 9.4        | 5,357                | 5.8        | 1.65 (1.59, 1.71)              |
| 996                  | Complications peculiar to certain specified procedures                       | 14,001               | 7.5        | 8,217              | 8.8        | 5,784                | 6.2        | 1.47 (1.42, 1.52)              |
| 239                  | Neoplasms of unspecified nature                                              | 13,958               | 7.5        | 7,688              | 8.3        | 6,270                | 6.7        | 1.25 (1.21, 1.30)              |
| 374                  | Other disorders of eyelids                                                   | 13,810               | 7.4        | 7,770              | 8.4        | 6,040                | 6.5        | 1.32 (1.27, 1.37)              |
| 388                  | Other disorders of ear                                                       | 13,784               | 7.4        | 8,203              | 8.8        | 5,581                | 6.0        | 1.50 (1.45, 1.55)              |
| 367                  | Disorders of refraction and accommodation                                    | 13,677               | 7.4        | 7,654              | 8.2        | 6,023                | 6.5        | 1.24 (1.20, 1.29)              |
| 473                  | Chronic sinusitis                                                            | 13,621               | 7.3        | 8,058              | 8.7        | 5,563                | 6.0        | 1.44 (1.39, 1.49)              |
| 701                  | Other hypertrophic and atrophic conditions of skin                           | 13,467               | 7.2        | 7,625              | 8.2        | 5,842                | 6.3        | 1.32 (1.28, 1.37)              |
| 411                  | Other acute and subacute forms of ischemic heart disease                     | 12,856               | 6.9        | 7,670              | 8.2        | 5,186                | 5.6        | 1.58 (1.52, 1.65)              |
| 268                  | Vitamin D deficiency                                                         | 12,568               | 6.8        | 8,045              | 8.7        | 4,523                | 4.9        | 1.70 (1.63, 1.77)              |
| 425                  | Cardiomyopathy                                                               | 11,899               | 6.4        | 6,784              | 7.3        | 5,115                | 5.5        | 1.37 (1.32, 1.42)              |
| 847                  | Sprains and strains of other and unspecified parts of back                   | 11,882               | 6.4        | 7,495              | 8.05       | 4,387                | 4.71       | 1.72 (1.65, 1.78)              |
| 574                  | Cholelithiasis                                                               | 11,582               | 6.2        | 6,707              | 7.21       | 4,875                | 5.24       | 1.41 (1.35, 1.46)              |
| 386                  | Vertiginous syndromes and other disorders of vestibular system               | 11,479               | 6.2        | 7,125              | 7.66       | 4,354                | 4.68       | 1.70 (1.64, 1.77)              |

## Comorbidity trajectories associated with Alzheimer's disease

| 3-digit ICD grouping | Description                                                                        | Overall<br>N=186,064 |            | Cases<br>N=93,032  |            | Controls<br>N=93,032 |            | OR from GEE model<br>(95% CI)* |
|----------------------|------------------------------------------------------------------------------------|----------------------|------------|--------------------|------------|----------------------|------------|--------------------------------|
|                      |                                                                                    | Number of patients   | Prevalence | Number of patients | Prevalence | Number of patients   | Prevalence |                                |
| V06                  | Need for prophylactic vaccination and inoculation against combinations of diseases | 11,355               | 6.1        | 6,738              | 7.24       | 4,617                | 4.96       | 1.47 (1.41, 1.52)              |
| 185                  | Malignant neoplasm of prostate                                                     | 11,265               | 6.1        | 6,229              | 6.7        | 5,036                | 5.4        | 1.37 (1.32, 1.43)              |
| 595                  | Cystitis                                                                           | 10,927               | 5.9        | 6,850              | 7.4        | 4,077                | 4.4        | 1.65 (1.5, 1.72)               |
| 327                  | Organic sleep disorders                                                            | 10,804               | 5.8        | 6,671              | 7.2        | 4,133                | 4.4        | 1.65 (1.58, 1.71)              |
| 462                  | Acute pharyngitis                                                                  | 10,634               | 5.7        | 5,952              | 6.4        | 4,682                | 5.0        | 1.31 (1.26, 1.37)              |
| 274                  | Gout                                                                               | 10,227               | 5.5        | 5,664              | 6.1        | 4,563                | 4.9        | 1.25 (1.20, 1.30)              |
| 441                  | Aortic aneurysm and dissection                                                     | 10,201               | 5.5        | 5,802              | 6.2        | 4,399                | 4.7        | 1.40 (1.34, 1.46)              |
| 355                  | Mononeuritis of lower limb                                                         | 10,045               | 5.4        | 6,199              | 6.7        | 3,846                | 4.1        | 1.62 (1.55, 1.69)              |
| 840                  | Sprains and strains of shoulder and upper arm                                      | 9,878                | 5.3        | 5,805              | 6.2        | 4,073                | 4.4        | 1.47 (1.41, 1.53)              |
| 412                  | Old myocardial infarction                                                          | 9,863                | 5.3        | 6,013              | 6.5        | 3,850                | 4.1        | 1.58 (1.51, 1.65)              |
| 625                  | Pain and other symptoms associated with female genital organs                      | 9,690                | 5.2        | 5,806              | 6.2        | 3,884                | 4.2        | 1.51 (1.45, 1.57)              |
| 53                   | Herpes zoster                                                                      | 9,372                | 5.0        | 5,403              | 5.8        | 3,969                | 4.3        | 1.41 (1.35, 1.47)              |
| 592                  | Calculus of kidney and ureter                                                      | 9,331                | 5.0        | 5,559              | 6.0        | 3,772                | 4.1        | 1.49 (1.43, 1.56)              |
| <b>CLUSTER 5</b>     |                                                                                    |                      |            |                    |            |                      |            |                                |
| 272                  | Disorders of lipid metabolism                                                      | 101,911              | 54.8       | 57,906             | 62.2       | 44,005               | 47.3       | 1.60 (1.58, 1.62)              |
| 729                  | Other disorders of soft tissues                                                    | 83,444               | 44.8       | 49,899             | 53.6       | 33,545               | 36.1       | 1.76 (1.74, 1.79)              |
| 366                  | Cataract                                                                           | 82,036               | 44.1       | 45,372             | 48.8       | 36,664               | 39.4       | 1.32 (1.3, 1.34)               |
| 715                  | Osteoarthritis and allied disorders                                                | 80,022               | 43.0       | 47,016             | 50.5       | 33,006               | 35.5       | 1.66 (1.64, 1.68)              |
| 724                  | Other and unspecified disorders of back                                            | 71,981               | 38.7       | 42,506             | 45.7       | 29,475               | 31.7       | 1.67 (1.65, 1.70)              |
| 789                  | Other symptoms involving abdomen and pelvis                                        | 70,320               | 37.8       | 41,863             | 44.0       | 28,457               | 30.6       | 1.73 (1.70, 1.75)              |
| 414                  | Other forms of chronic ischemic heart disease                                      | 66,130               | 35.5       | 37,906             | 40.7       | 28,224               | 30.3       | 1.64 (1.61, 1.66)              |
| 787                  | Symptoms involving digestive system                                                | 64,251               | 34.5       | 39,632             | 42.6       | 24,619               | 26.5       | 1.84 (1.81, 1.88)              |
| V58                  | Encounter for other and unspecified procedures and aftercare                       | 63,772               | 34.3       | 37,213             | 34.0       | 26,559               | 28.5       | 1.53 (1.51, 1.56)              |
| 733                  | Other disorders of bone and cartilage                                              | 60,220               | 32.4       | 35,141             | 37.8       | 25,079               | 27.0       | 1.57 (1.54, 1.60)              |
| 782                  | Symptoms involving skin and other integumentary tissue                             | 58,952               | 31.7       | 35,630             | 38.3       | 23,322               | 25.1       | 1.66 (1.64, 1.69)              |

| 3-digit ICD grouping | Description                                                                              | Overall<br>N=186,064 |            | Cases<br>N=93,032  |            | Controls<br>N=93,032 |            | OR from GEE model<br>(95% CI)* |
|----------------------|------------------------------------------------------------------------------------------|----------------------|------------|--------------------|------------|----------------------|------------|--------------------------------|
|                      |                                                                                          | Number of patients   | Prevalence | Number of patients | Prevalence | Number of patients   | Prevalence |                                |
| 250                  | Diabetes mellitus                                                                        | 53,171               | 28.6       | 30,073             | 32.3       | 23,098               | 24.8       | 1.68 (1.65, 1.71)              |
| 788                  | Symptoms involving urinary system                                                        | 52,742               | 28.3       | 33,397             | 35.9       | 19,345               | 20.8       | 1.94 (1.90, 1.97)              |
| V04                  | Need for prophylactic vaccination and inoculation against certain diseases               | 51,621               | 27.7       | 29,855             | 32.1       | 21,766               | 23.4       | 1.44 (1.41, 1.46)              |
| 362                  | Other retinal disorders                                                                  | 49,805               | 26.8       | 28,387             | 30.5       | 21,418               | 23.0       | 1.43 (1.41, 1.46)              |
| 785                  | Symptoms involving cardiovascular system                                                 | 49,111               | 26.4       | 28,334             | 30.5       | 20,777               | 22.3       | 1.44 (1.41, 1.47)              |
| 530                  | Diseases of esophagus                                                                    | 49,013               | 26.3       | 28,788             | 30.9       | 20,225               | 21.7       | 1.56 (1.53, 1.59)              |
| 793                  | Non-specific (abnormal) findings on radiological and other examination of body structure | 48,479               | 26.1       | 28,358             | 30.5       | 20,121               | 21.6       | 1.45 (1.42, 1.48)              |
| 285                  | Other and unspecified anemias                                                            | 48,234               | 25.9       | 29,199             | 31.4       | 19,035               | 20.5       | 1.63 (1.60, 1.66)              |
| 518                  | Other diseases of lung                                                                   | 46,216               | 24.8       | 26,596             | 28.6       | 19,620               | 21.1       | 1.41 (1.38, 1.44)              |
| 424                  | Other diseases of endocardium                                                            | 44,749               | 24.1       | 26,125             | 28.1       | 18,624               | 20.0       | 1.45 (1.43, 1.48)              |
| 722                  | Intervertebral disc disorders                                                            | 44,055               | 23.7       | 26,276             | 28.2       | 17,779               | 19.1       | 1.60 (1.57, 1.63)              |
| 794                  | Non-specific abnormal results of function studies                                        | 42,948               | 23.1       | 25,955             | 27.9       | 16,993               | 18.3       | 1.61 (1.58, 1.65)              |
| 790                  | Non-specific findings on examination of blood                                            | 41,454               | 22.3       | 24,661             | 26.5       | 16,793               | 18.1       | 1.49 (1.46, 1.52)              |
| 433                  | Occlusion and stenosis of precerebral arteries                                           | 40,440               | 21.7       | 25,614             | 27.5       | 14,826               | 15.9       | 1.79 (1.75, 1.83)              |
| 562                  | Diverticula of intestine                                                                 | 38,712               | 20.8       | 22,321             | 24.0       | 16,391               | 17.6       | 1.44 (1.41, 1.47)              |
| 244                  | Acquired hypothyroidism                                                                  | 38,087               | 20.5       | 22,754             | 24.5       | 15,333               | 16.5       | 1.62 (1.59, 1.66)              |
| 389                  | Hearing loss                                                                             | 37,716               | 20.3       | 22,885             | 24.6       | 14,831               | 15.9       | 1.67 (1.64, 1.71)              |
| 496                  | Chronic airway obstruction, not elsewhere classified                                     | 37,651               | 20.2       | 21,720             | 23.3       | 15,931               | 17.1       | 1.47 (1.44, 1.50)              |
| 429                  | Ill-defined descriptions and complications of heart disease                              | 36,462               | 19.6       | 22,149             | 23.8       | 14,313               | 15.4       | 1.62 (1.58, 1.66)              |
| V45                  | Other postprocedural states                                                              | 35,833               | 19.3       | 20,928             | 22.5       | 14,905               | 16.0       | 1.52 (1.49, 1.56)              |
| 564                  | Functional digestive disorders, not elsewhere classified                                 | 33,810               | 18.2       | 21,843             | 23.5       | 11,967               | 12.9       | 1.99 (1.95, 2.04)              |
| 721                  | Spondylosis and allied disorders                                                         | 33,716               | 18.1       | 20,503             | 22.0       | 13,213               | 14.2       | 1.66 (1.62, 1.69)              |
| 380                  | Disorders of external ear                                                                | 32,857               | 17.7       | 19,330             | 20.8       | 13,527               | 14.5       | 1.49 (1.45, 1.52)              |

## Comorbidity trajectories associated with Alzheimer's disease

| 3-digit ICD grouping | Description                                     | Overall<br>N=186,064 |            | Cases<br>N=93,032  |            | Controls<br>N=93,032 |            | OR from GEE model<br>(95% CI)* |
|----------------------|-------------------------------------------------|----------------------|------------|--------------------|------------|----------------------|------------|--------------------------------|
|                      |                                                 | Number of patients   | Prevalence | Number of patients | Prevalence | Number of patients   | Prevalence |                                |
| 440                  | Atherosclerosis                                 | 30,406               | 16.3       | 18,564             | 120.0      | 11,842               | 12.7       | 1.58 (1.54, 1.62)              |
| 682                  | Other cellulitis and abscess                    | 29,291               | 15.7       | 18,002             | 19.4       | 11,289               | 12.1       | 1.70 (1.66, 1.74)              |
| 443                  | Other peripheral vascular disease               | 29,215               | 15.7       | 17,991             | 19.3       | 11,224               | 12.1       | 1.63 (1.59, 1.67)              |
| 723                  | Other disorders of cervical region              | 29,183               | 15.7       | 17,982             | 19.3       | 11,201               | 12.0       | 1.68 (1.64, 1.72)              |
| 600                  | Hyperplasia of prostate                         | 29,144               | 15.7       | 17,336             | 18.6       | 11,808               | 12.7       | 1.60 (1.56, 1.64)              |
| V12                  | Personal history of certain other diseases      | 28,792               | 15.5       | 17,666             | 19.0       | 11,126               | 12.0       | 1.70 (1.66, 1.74)              |
| 716                  | Other and unspecified arthropathies             | 28,064               | 15.1       | 17,131             | 18.4       | 10,933               | 11.8       | 1.67 (1.63, 1.71)              |
| 703                  | Diseases of nail                                | 26,795               | 14.4       | 17,132             | 18.4       | 9,663                | 10.4       | 1.82 (1.78, 1.87)              |
| 535                  | Gastritis and duodenitis                        | 23,421               | 12.6       | 14,279             | 15.4       | 9,142                | 9.8        | 1.69 (1.64, 1.73)              |
| 578                  | Gastrointestinal hemorrhage                     | 21,254               | 11.4       | 12,872             | 13.8       | 8,382                | 9.0        | 1.59 (1.55, 1.64)              |
| V54                  | Other orthopedic aftercare                      | 18,764               | 10.1       | 11,788             | 12.7       | 6,976                | 7.5        | 1.68 (1.63, 1.73)              |
| 735                  | Acquired deformities of toe                     | 16,404               | 8.8        | 10,301             | 11.1       | 6,103                | 6.6        | 1.73 (1.67, 1.79)              |
| 338                  | Pain, not elsewhere classified                  | 14,834               | 8.0        | 9,557              | 10.3       | 5,277                | 5.7        | 1.82 (1.75, 1.89)              |
| 596                  | Other disorders of bladder                      | 14,444               | 7.8        | 9,243              | 9.9        | 5,201                | 5.6        | 1.88 (1.81, 1.95)              |
| 368                  | Visual disturbances                             | 14,121               | 7.6        | 8,878              | 9.5        | 5,243                | 5.6        | 1.73 (1.67, 1.79)              |
| 356                  | Hereditary and idiopathic peripheral neuropathy | 13,455               | 7.2        | 8,604              | 9.3        | 4,851                | 5.2        | 1.84 (1.77, 1.91)              |
| 281                  | Other deficiency anemias                        | 12,172               | 6.5        | 8,002              | 8.6        | 4,170                | 4.5        | 1.98 (1.91, 2.07)              |

AD, Alzheimer's disease; CI, confidence interval; GEE, generalized estimating equation; ICD, International Classification of Disease, OR, odds ratio

\*ORs comparing AD versus controls at the mean follow-up time prior to AD diagnosis



### Supplementary Figure 1. Comorbidities with highest odds ratios in AD cases compared to controls in the period prior to index date

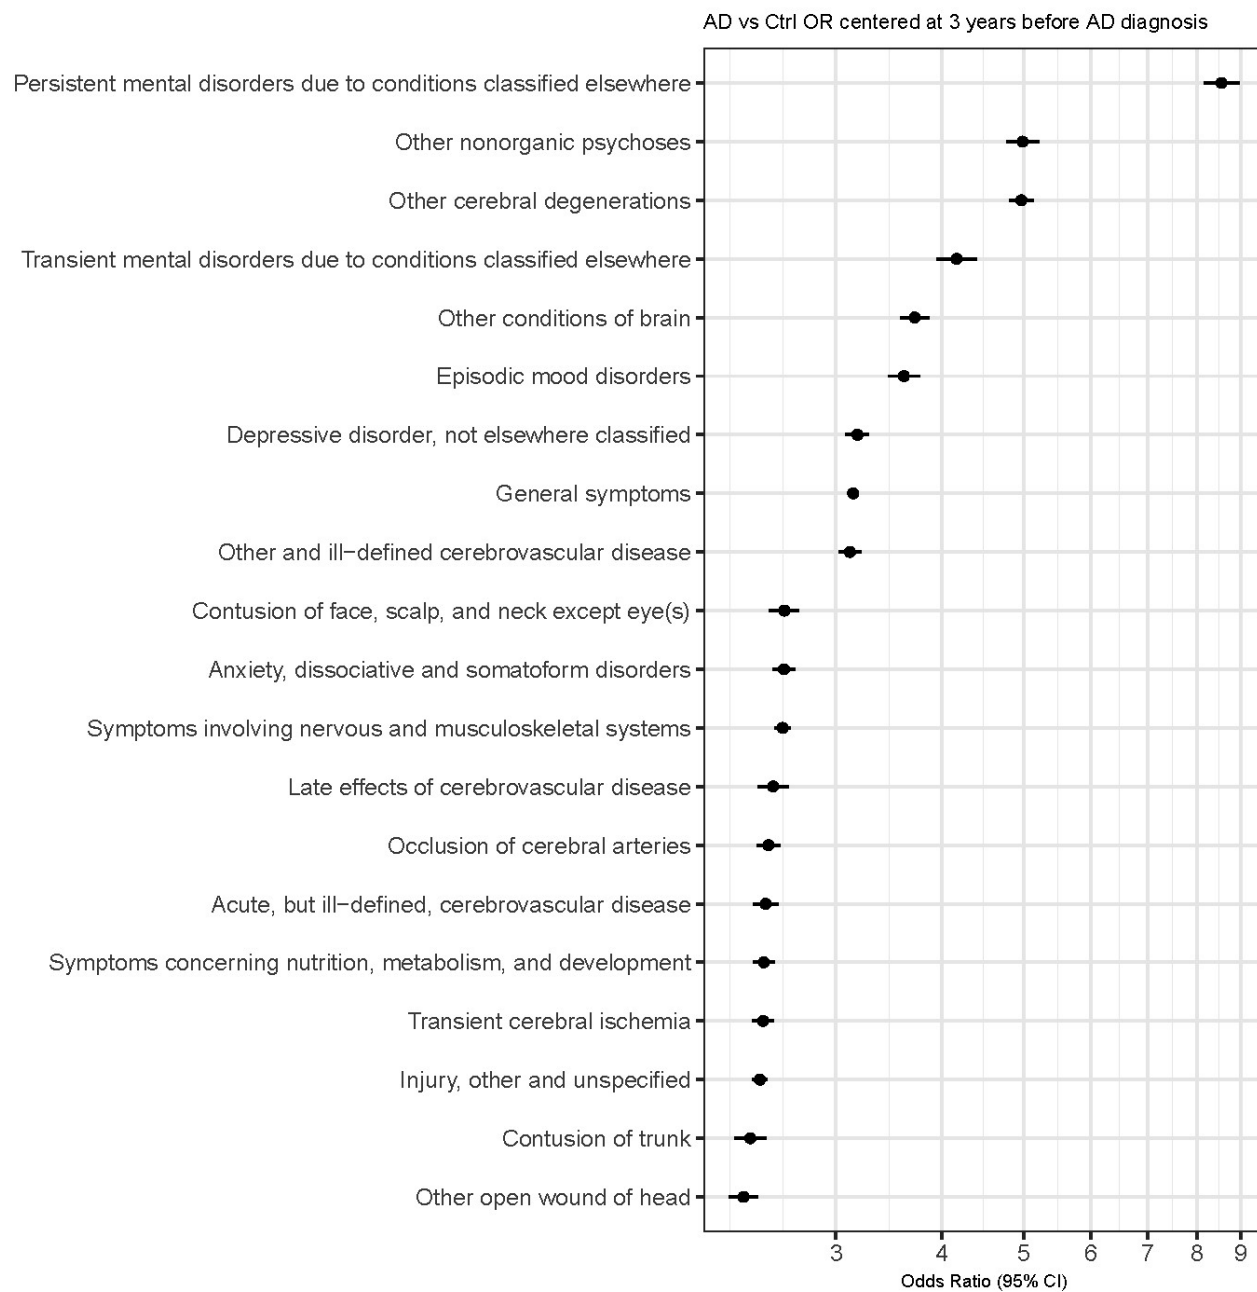

AD, Alzheimer's disease; ctrl, control; OR, odds ratio

Supplementary Figure 2. Distribution of comorbidities in a) the first and second principal components and b) the first and third principal components

a) First and second principal components

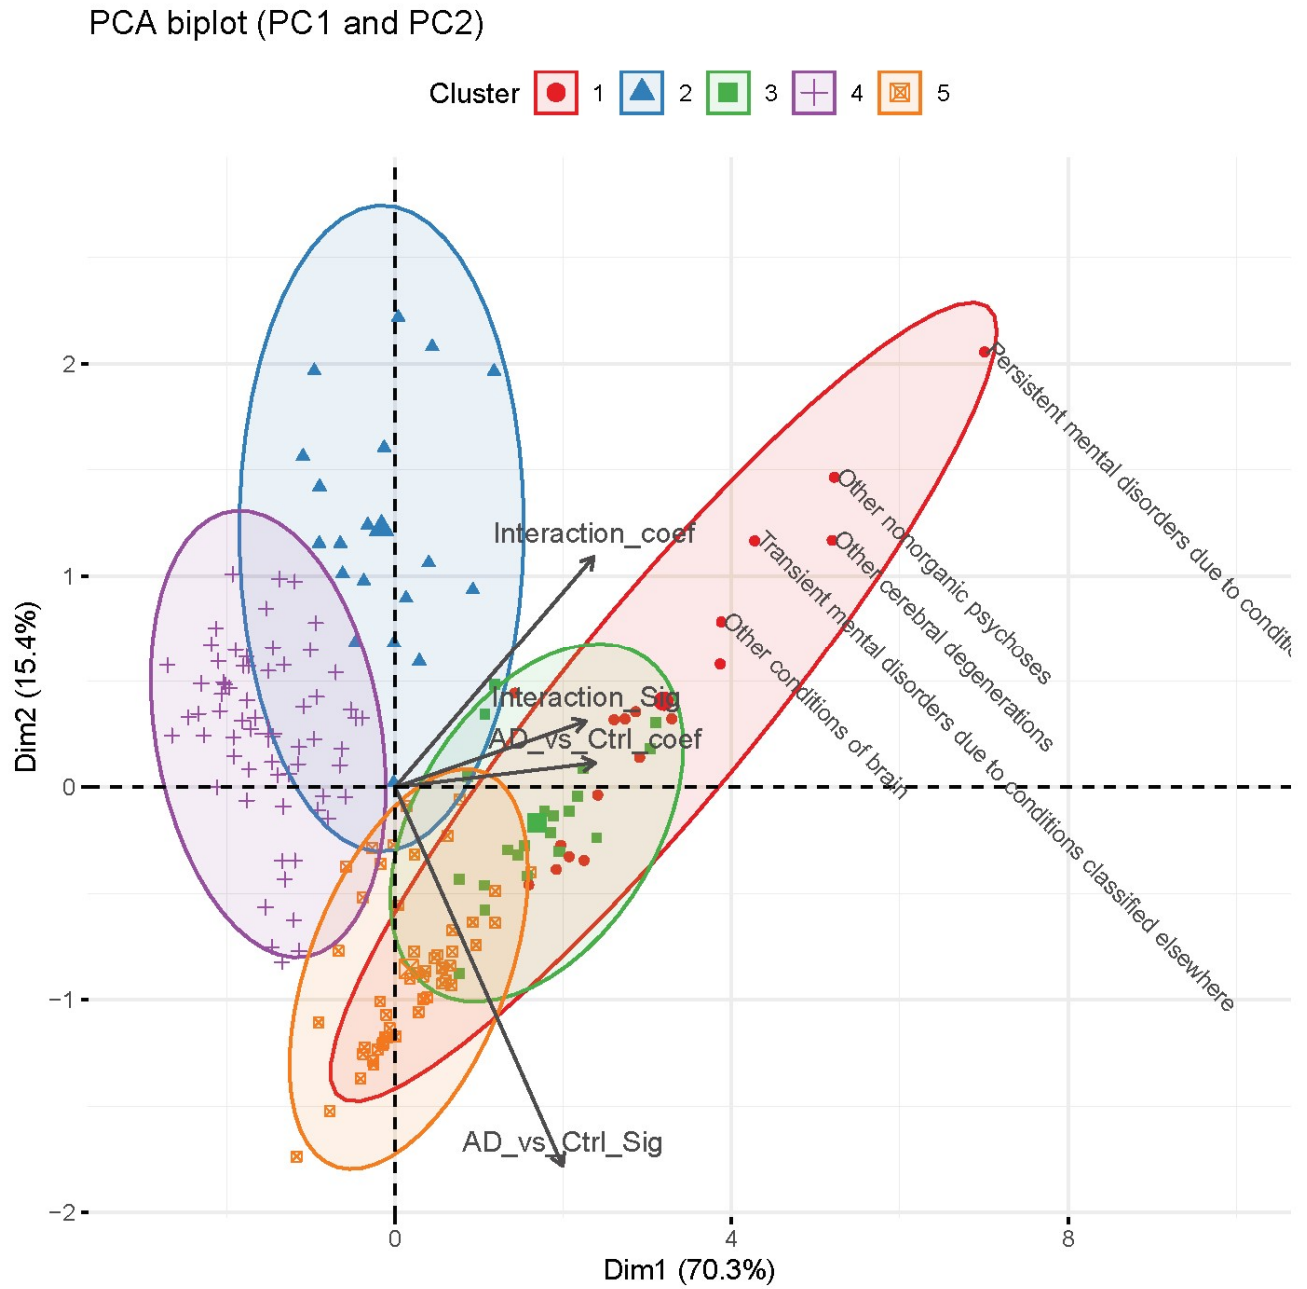

**b) First and third principal components**

PCA biplot (PC1 and PC3)

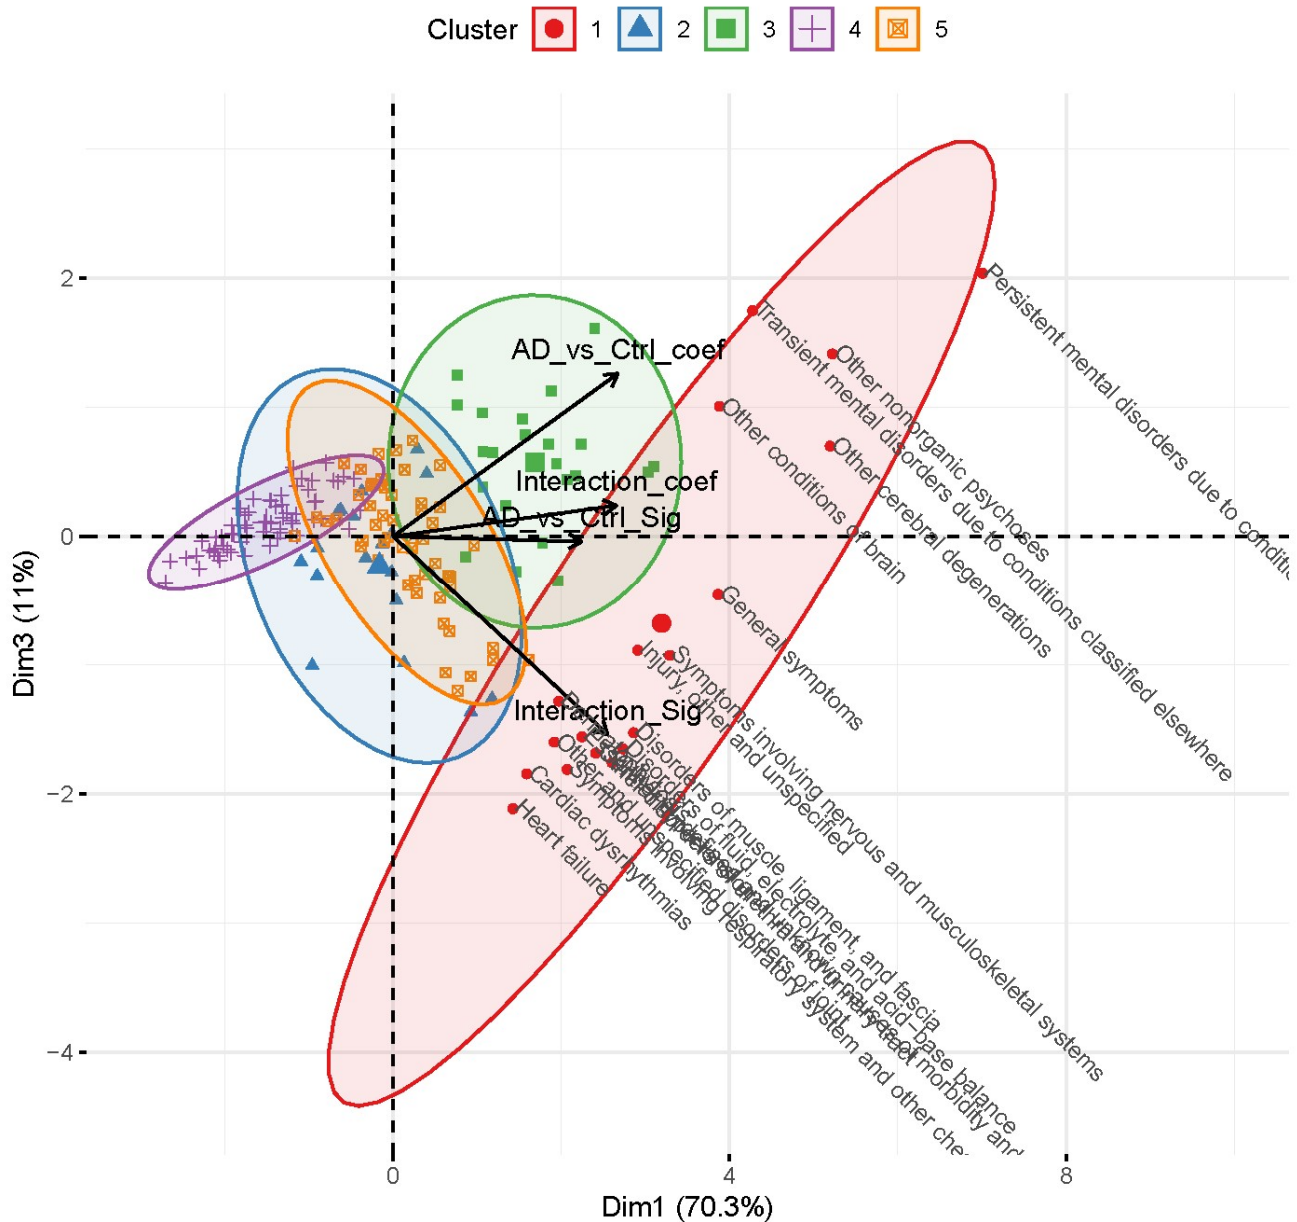

AD, Alzheimer’s disease; ctrl, control; PC, principal component; PCA, principal component analysis

Dim1, Dim2, Dim3 = principal components 1,2 3 respectively. Numbers in brackets are proportion or variability explained by each principal component.

AD\_versus\_ctrl\_Coef = size of overall comorbidity prevalence difference between cases and controls.  
 AD\_versus\_ctrl\_Sig = p-value for overall comorbidity prevalence difference between cases and controls.  
 Interaction\_Coef = size of comorbidity trajectory over time difference between cases and controls.  
 Interaction\_Sig = p-value for comorbidity trajectory over time difference between cases and controls.

Supplementary Figure 3. Main clusters of comorbidities from the hierarchical cluster analysis conducted on the four principal components

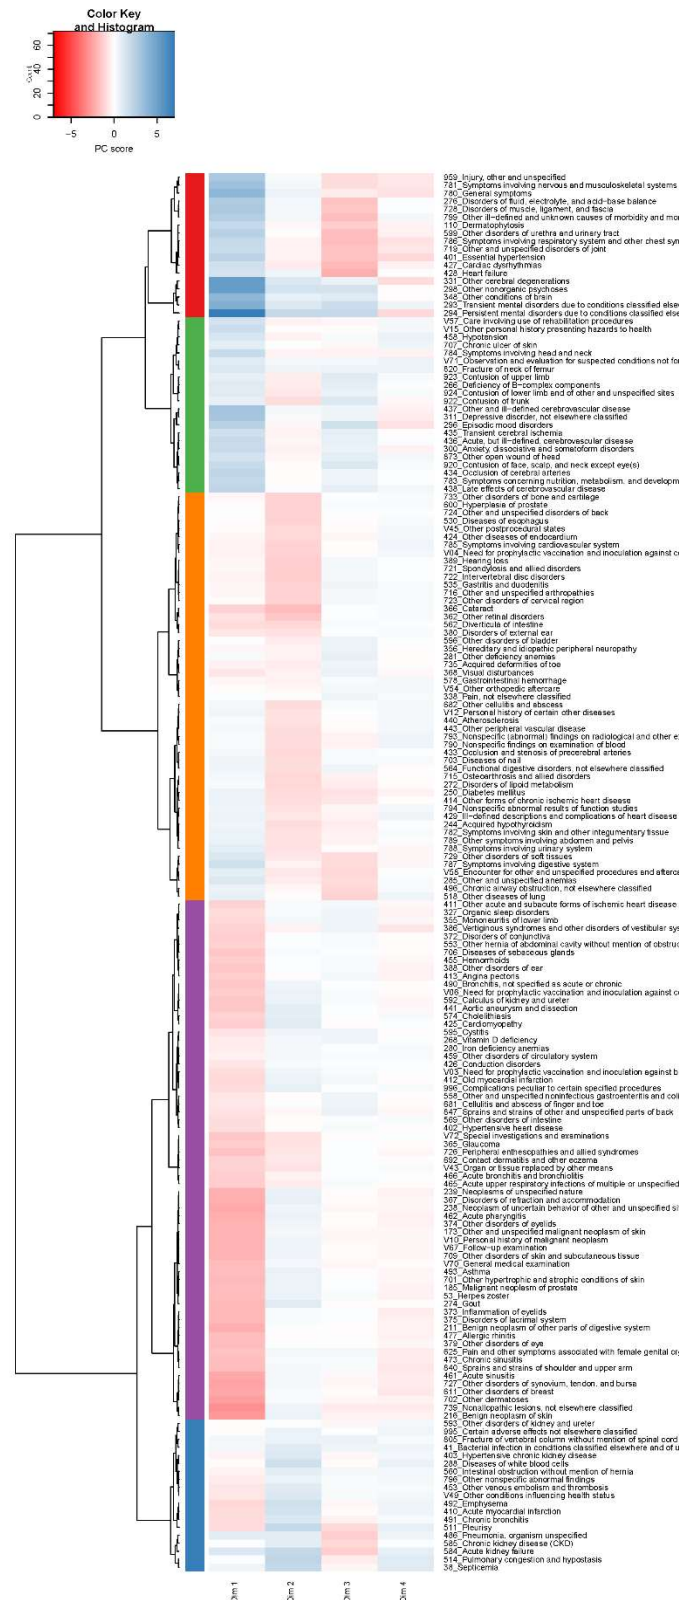

Cluster 1 (red), Cluster 2 (green), Cluster 3 (orange), cluster 4 (purple), Cluster 5 (blue).

### Supplementary Figure 4. Time trajectories of comorbidities during the 5-year period before AD diagnosis between AD cases and controls in different clusters

a) Cluster 1

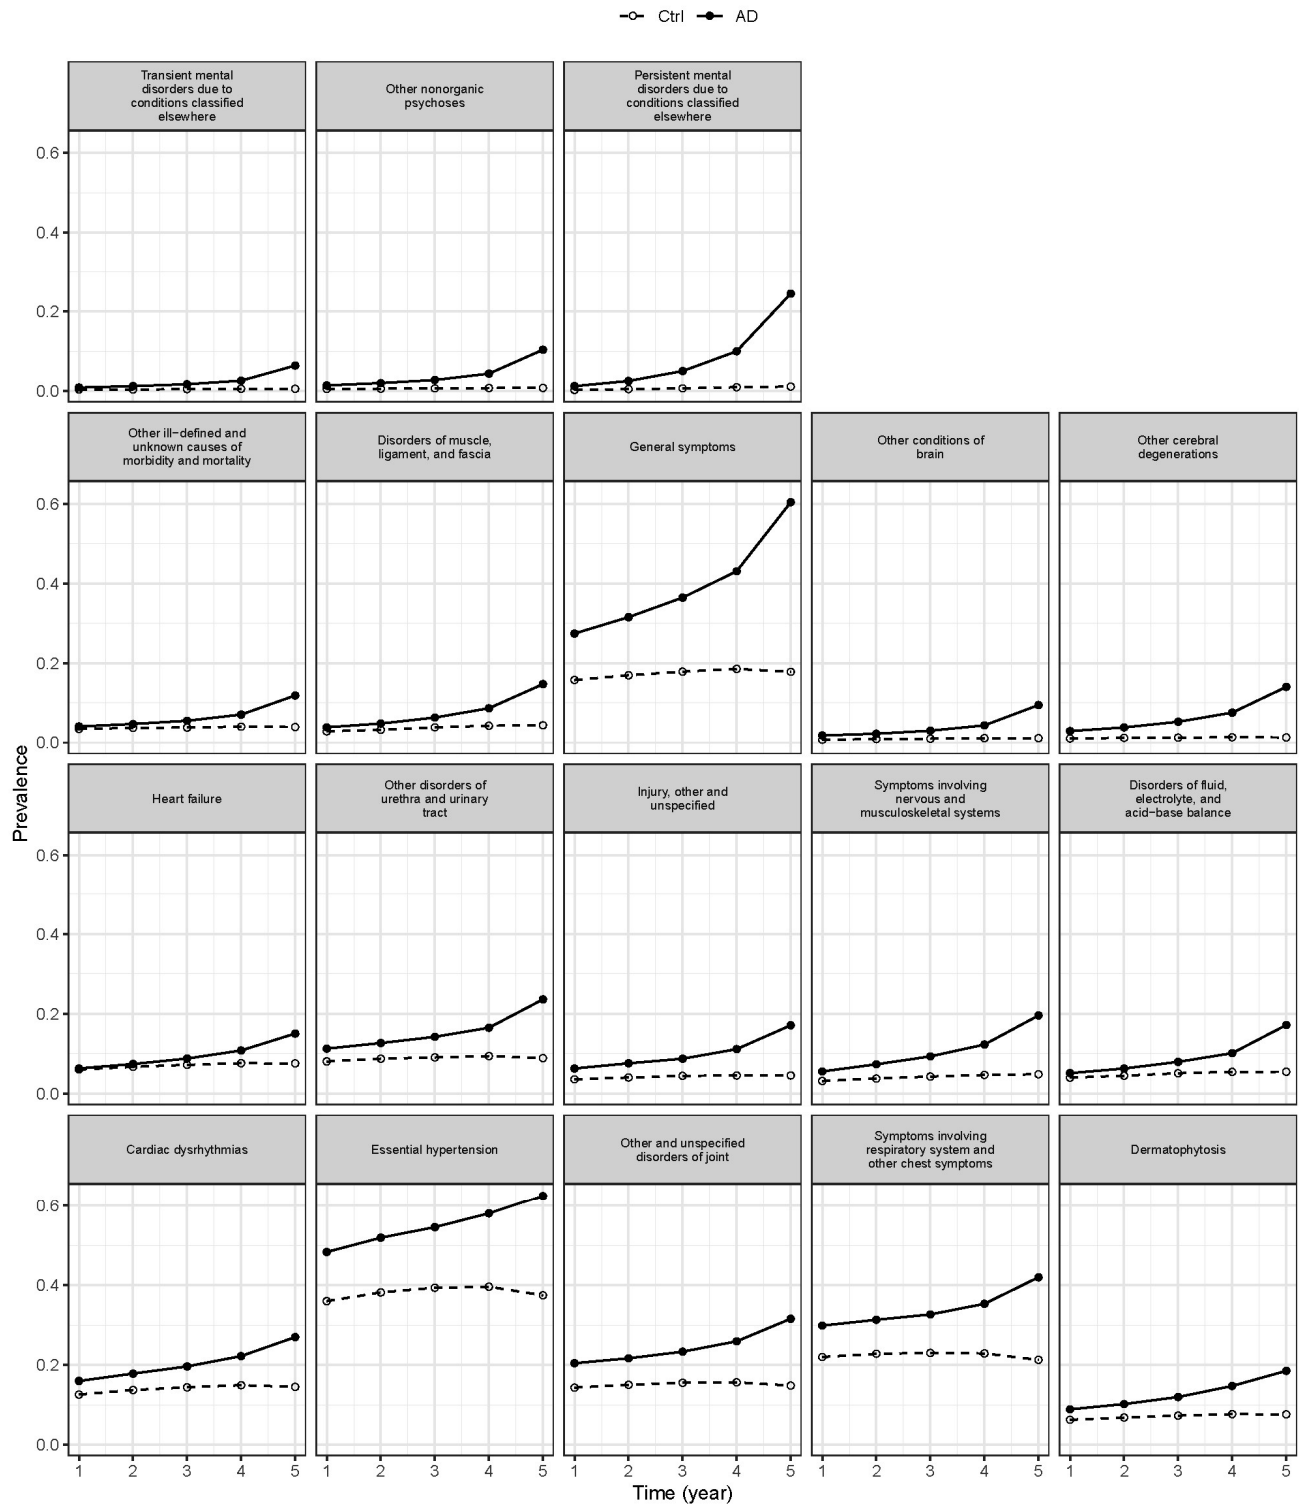

# Comorbidity trajectories associated with Alzheimer's disease

b) Cluster 2

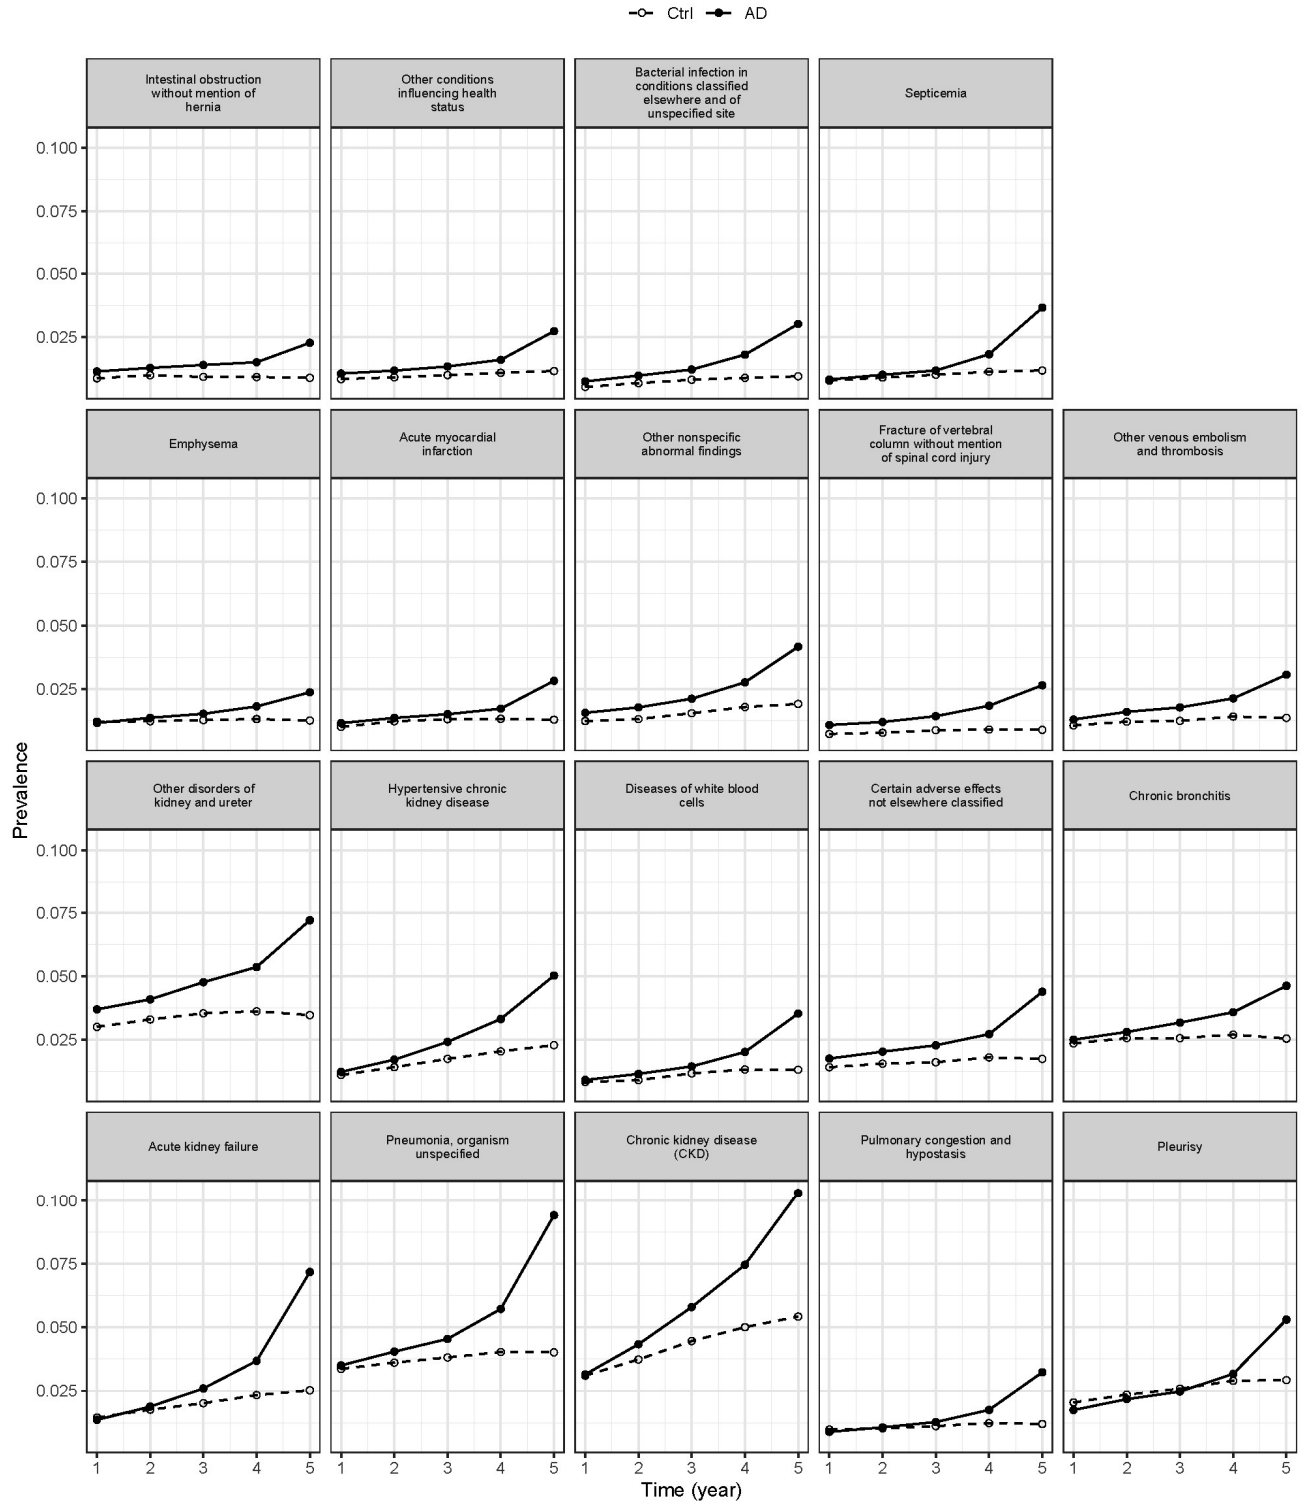

c) Cluster 3

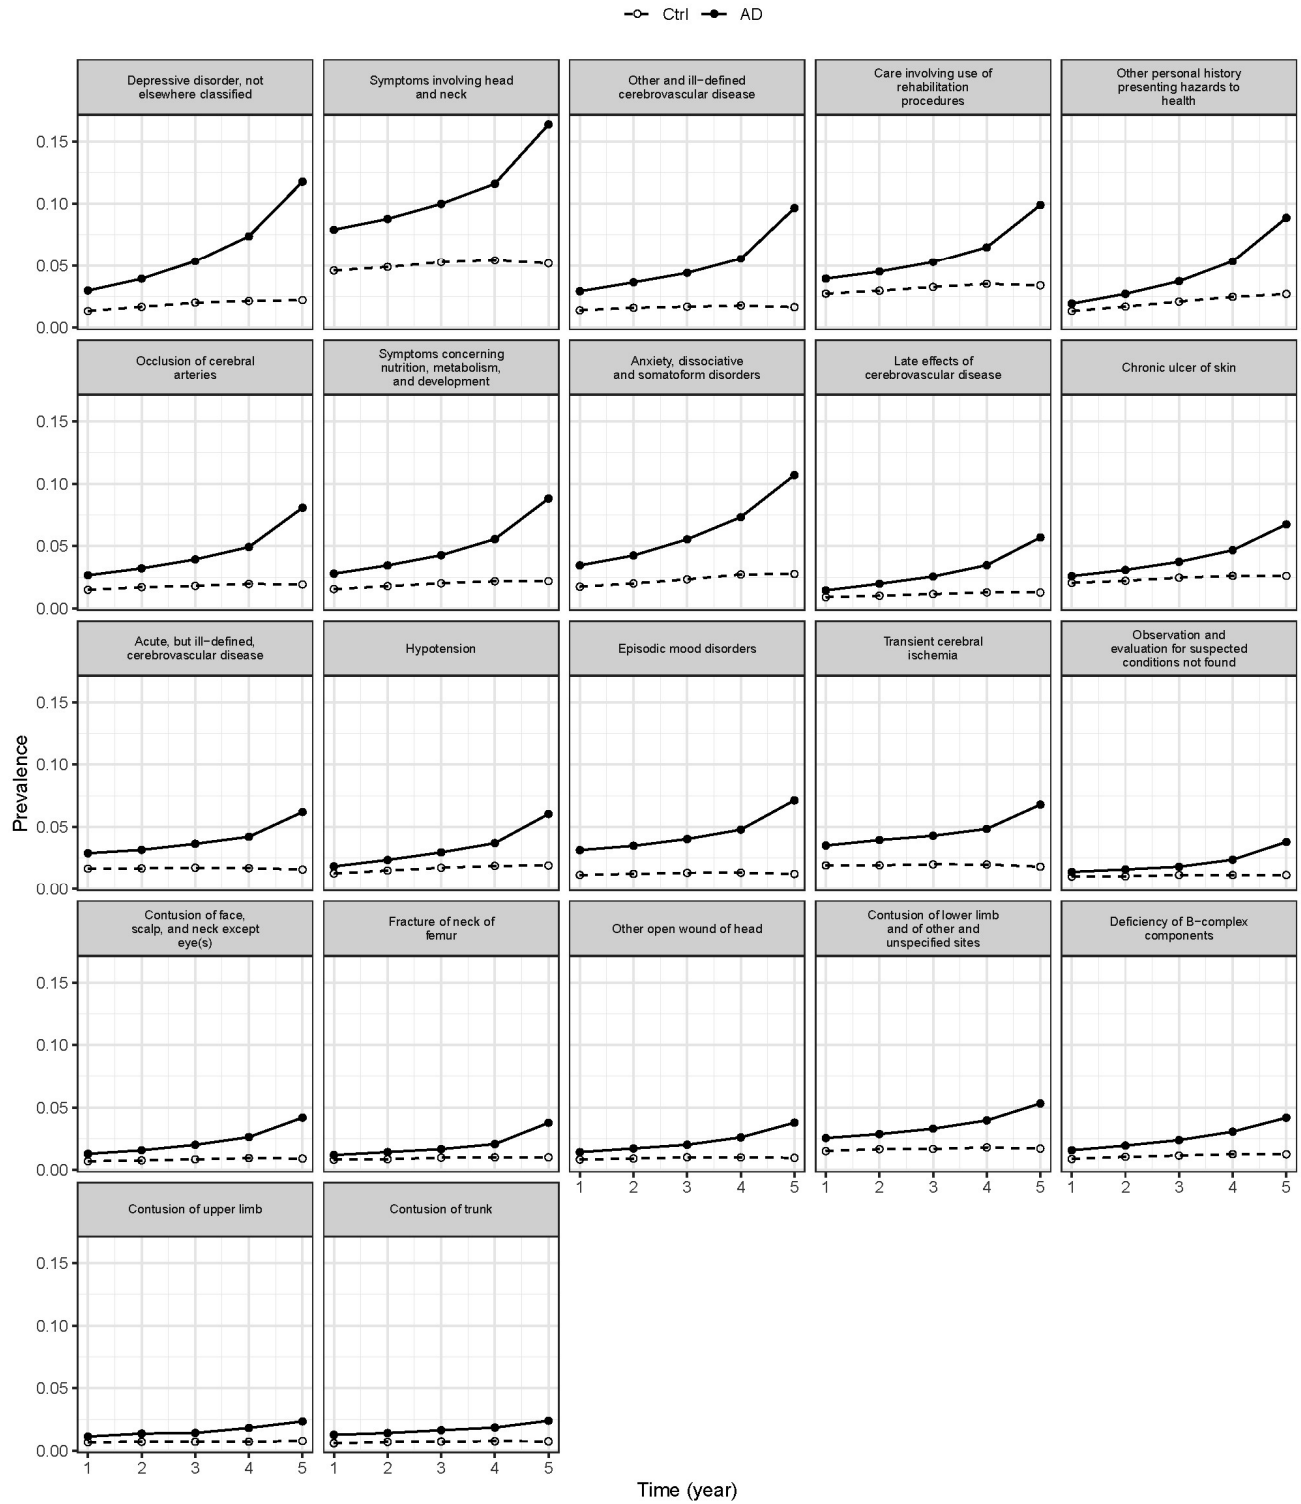

# Comorbidity trajectories associated with Alzheimer's disease

d) Cluster 4

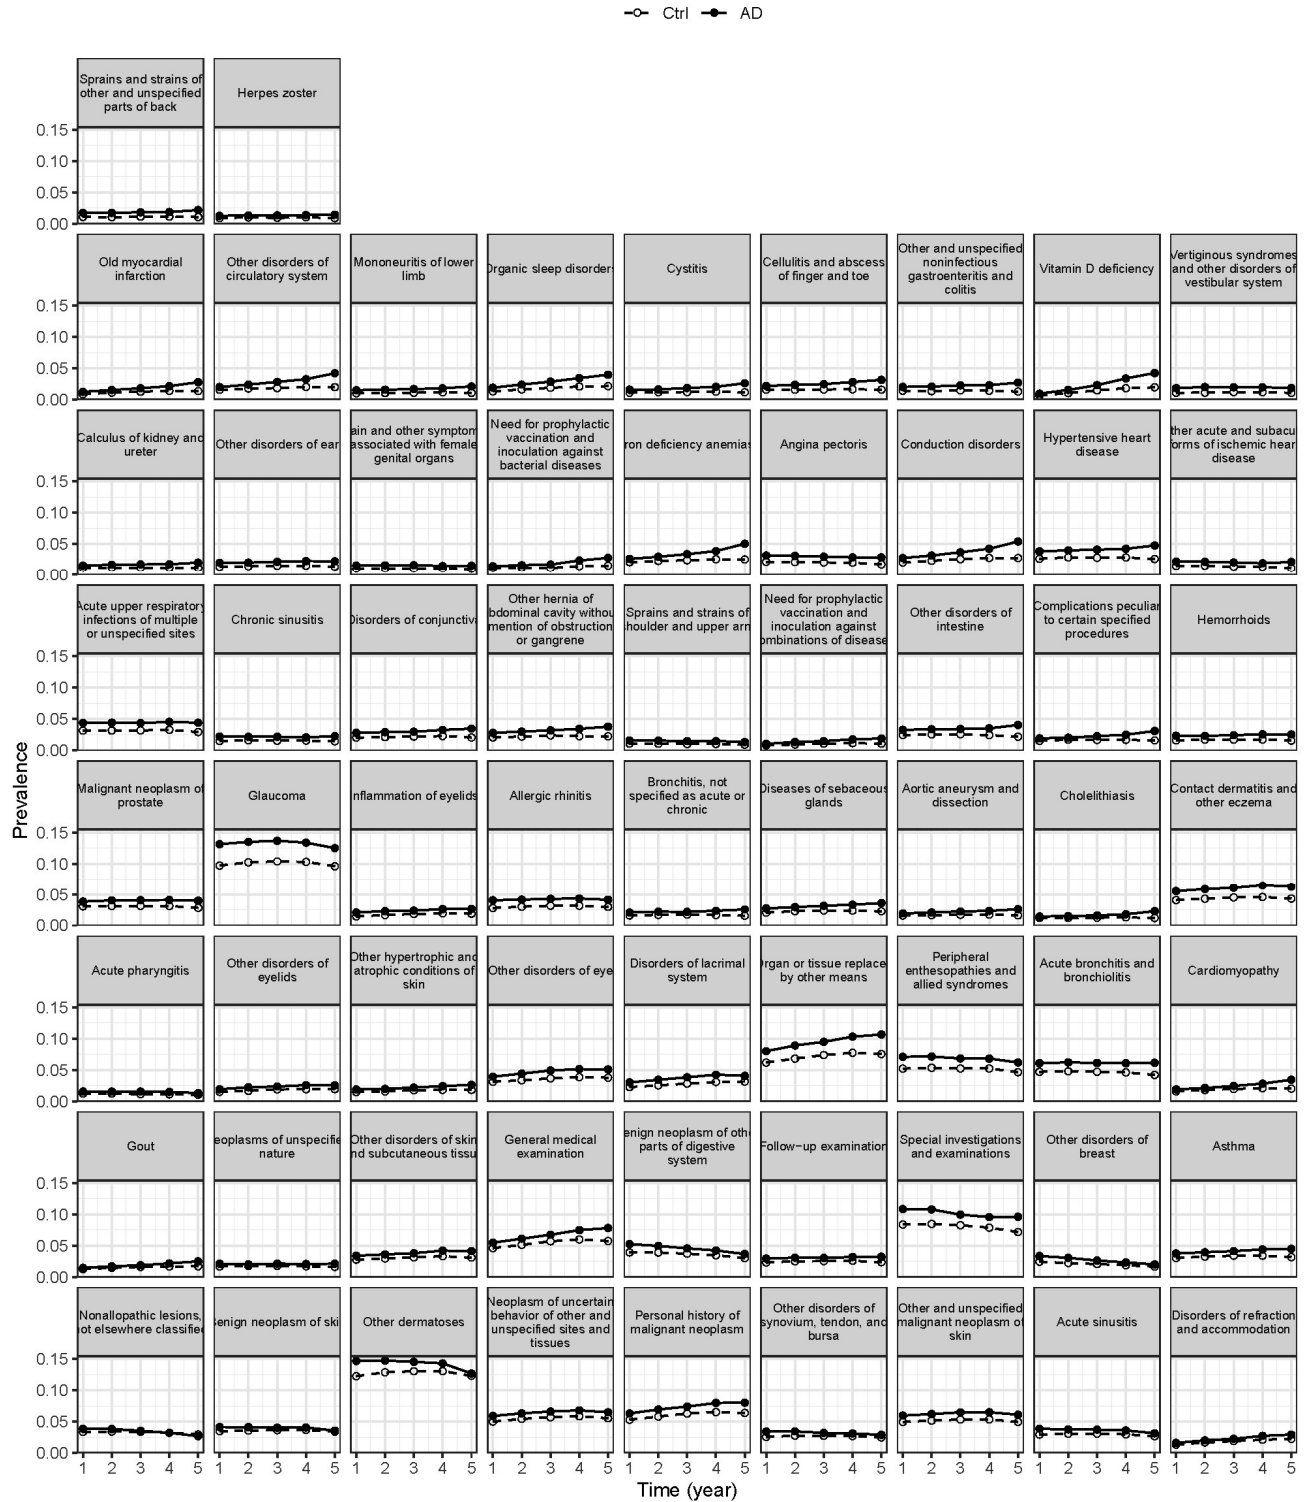



e) Cluster 5

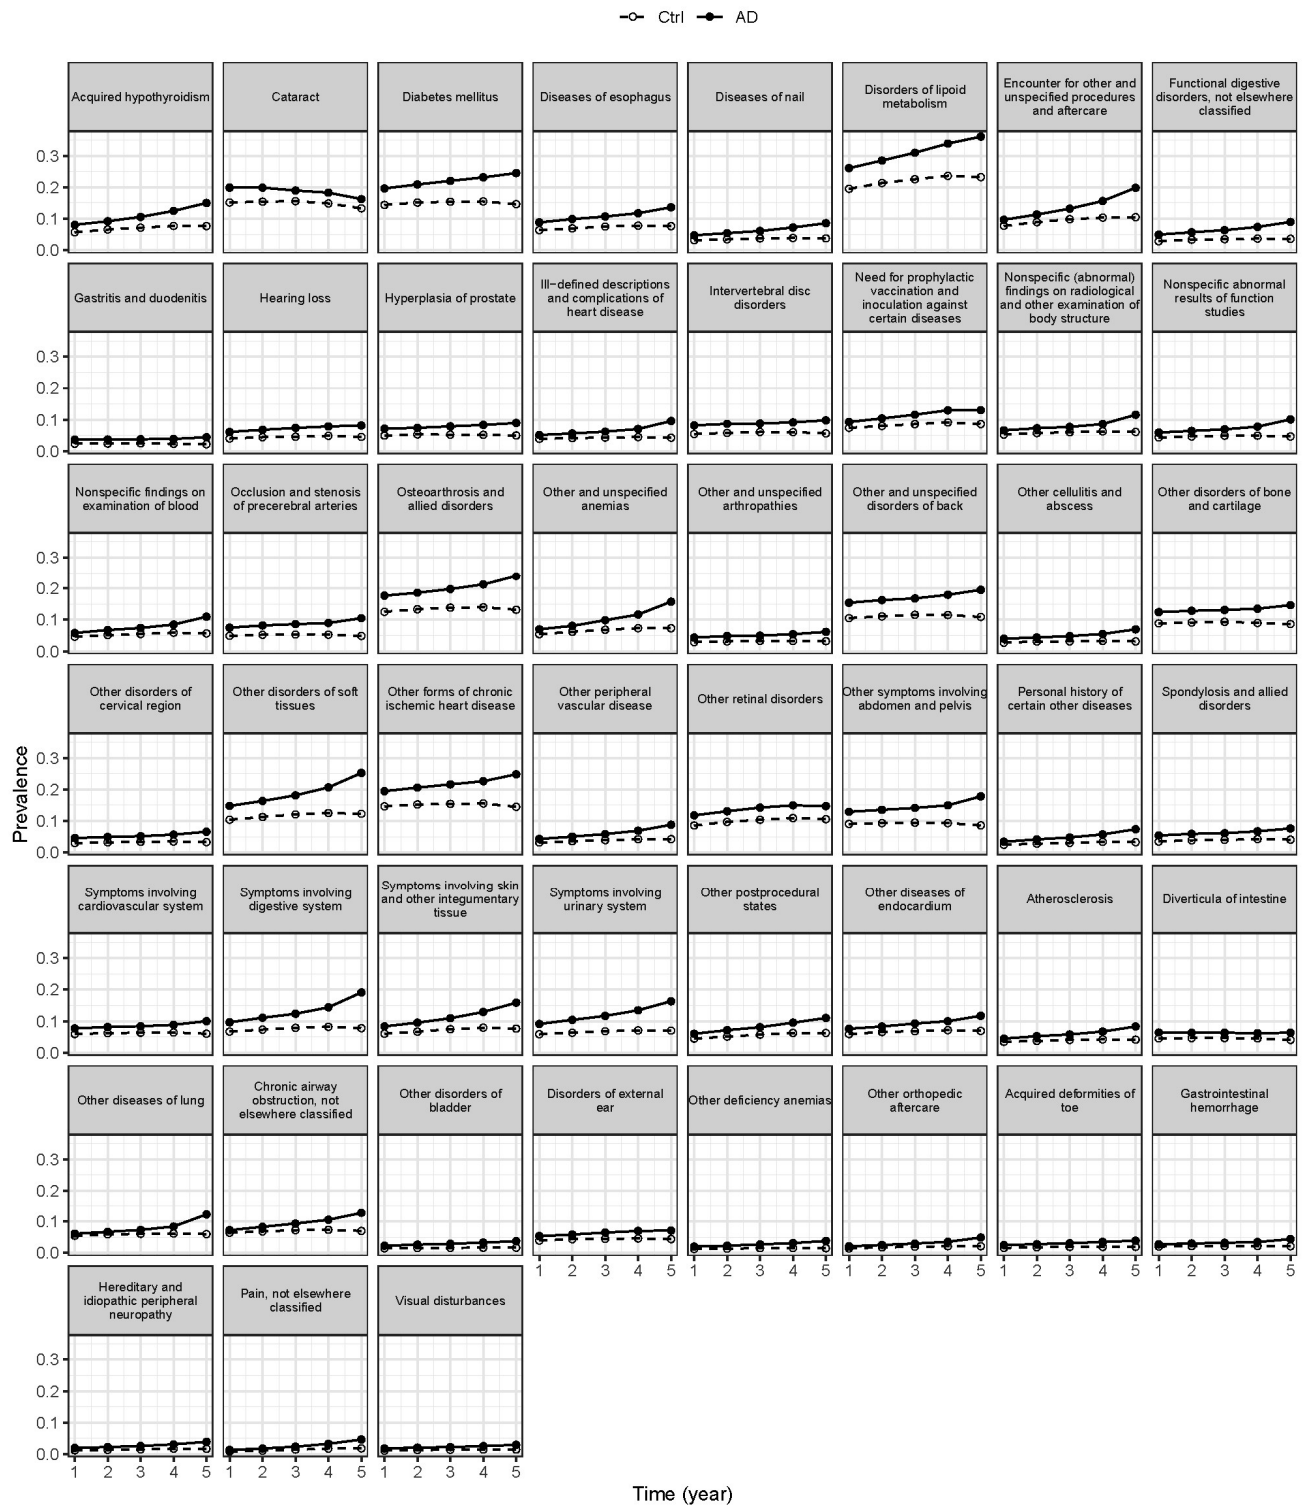

AD, Alzheimer's disease; ctrl, control
